# Supplementary material
Source: publisher site journal article supplement (https://www.dovepress.com/get_supplementary_file.php?f=373534.docx)
Supplement: Supplementary file 1 [file get_supplementary_file.php]

| **Table S1. Overview of skin physiological testing** | | | | | | | | | |
| --- | --- | --- | --- | --- | --- | --- | --- | --- | --- |
|  | | N | Mean | Std. Deviation | Std. Error | 95% Confidence Interval for Mean | | Minimum | Maximum |
| Lower Bound | Upper Bound |
| TEWL | Rosacea | 150 | 15.9893 | 6.48994 | .52990 | 14.9422 | 17.0364 | 4.90 | 43.20 |
| Acne | 100 | 17.0110 | 6.51086 | .65109 | 15.7191 | 18.3029 | 5.20 | 31.70 |
| Dermatitis | 100 | 24.5680 | 10.39622 | 1.03962 | 22.5052 | 26.6308 | 6.50 | 53.40 |
| Normal | 100 | 10.6166 | 3.03796 | .30380 | 10.0138 | 11.2194 | 6.60 | 28.30 |
| Total | 450 | 16.9288 | 8.44733 | .39821 | 16.1462 | 17.7114 | 4.90 | 53.40 |
| Water Content | Rosacea | 150 | 65.3141 | 10.54734 | .86119 | 63.6123 | 67.0158 | 33.30 | 92.00 |
| Acne | 100 | 62.0124 | 11.10940 | 1.11094 | 59.8081 | 64.2167 | 22.03 | 83.50 |
| Dermatitis | 100 | 51.1255 | 17.33048 | 1.73305 | 47.6868 | 54.5642 | 13.25 | 85.30 |
| Normal | 100 | 67.3687 | 6.86783 | .68678 | 66.0060 | 68.7314 | 52.86 | 86.45 |
| Total | 450 | 61.8839 | 13.31034 | .62746 | 60.6508 | 63.1170 | 13.25 | 92.00 |
| Elasticity | Rosacea | 150 | 61.5840 | 9.26679 | .75663 | 60.0889 | 63.0791 | 42.86 | 91.67 |
| Acne | 100 | 63.4671 | 9.40046 | .94005 | 61.6018 | 65.3324 | 39.66 | 93.00 |
| Dermatitis | 100 | 55.7649 | 10.62154 | 1.06215 | 53.6574 | 57.8724 | 33.33 | 79.49 |
| Normal | 100 | 69.8317 | 7.18643 | .71864 | 68.4058 | 71.2576 | 52.62 | 87.18 |
| Total | 450 | 62.5422 | 10.33465 | .48718 | 61.5847 | 63.4996 | 33.33 | 93.00 |
| PH | Rosacea | 150 | 5.8649 | .49075 | .04007 | 5.7857 | 5.9440 | 4.56 | 7.71 |
| Acne | 100 | 5.8746 | .44154 | .04415 | 5.7870 | 5.9622 | 4.47 | 7.51 |
| Dermatitis | 100 | 5.9206 | .37476 | .03748 | 5.8463 | 5.9950 | 4.98 | 6.98 |
| Normal | 100 | 5.7243 | .33461 | .03346 | 5.6579 | 5.7907 | 4.46 | 6.24 |
| Total | 450 | 5.8482 | .42825 | .02019 | 5.8085 | 5.8879 | 4.46 | 7.71 |
| Melanin Index | Rosacea | 150 | 103.9067 | 43.52309 | 3.55365 | 96.8846 | 110.9287 | 10.00 | 270.00 |
| Acne | 100 | 136.8800 | 38.14070 | 3.81407 | 129.3121 | 144.4479 | 66.00 | 245.00 |
| Dermatitis | 100 | 129.7400 | 52.27871 | 5.22787 | 119.3668 | 140.1132 | 12.00 | 293.00 |
| Normal | 100 | 111.2000 | 30.95516 | 3.09552 | 105.0578 | 117.3422 | 66.00 | 182.00 |
| Total | 450 | 118.5956 | 44.15463 | 2.08147 | 114.5049 | 122.6862 | 10.00 | 293.00 |
| Erythema Index | Rosacea | 150 | 449.2600 | 102.72753 | 8.38767 | 432.6859 | 465.8341 | 222.00 | 727.00 |
| Acne | 100 | 405.5400 | 66.83092 | 6.68309 | 392.2793 | 418.8007 | 269.00 | 570.00 |
| Dermatitis | 100 | 424.6400 | 93.14424 | 9.31442 | 406.1582 | 443.1218 | 245.00 | 781.00 |
| Normal | 100 | 281.2200 | 44.60457 | 4.46046 | 272.3695 | 290.0705 | 189.00 | 429.00 |
| Total | 450 | 396.7311 | 104.51138 | 4.92671 | 387.0488 | 406.4134 | 189.00 | 781.00 |
| Lactate | Rosacea | 150 | 36.7667 | 51.77383 | 4.22732 | 28.4134 | 45.1199 | .00 | 221.00 |
| Acne | 100 | 32.4800 | 47.42660 | 4.74266 | 23.0695 | 41.8905 | .00 | 121.00 |
| Dermatitis | 100 | 58.6000 | 57.56542 | 5.75654 | 47.1778 | 70.0222 | .00 | 222.00 |
| Normal | 100 | 8.6400 | 28.26445 | 2.82645 | 3.0317 | 14.2483 | .00 | 110.00 |
| Total | 450 | 34.4156 | 50.72660 | 2.39127 | 29.7161 | 39.1150 | .00 | 222.00 |
| Lipid | Rosacea | 150 | 60.6580 | 28.12086 | 2.29606 | 56.1210 | 65.1950 | 2.00 | 183.00 |
| Acne | 100 | 75.9233 | 26.27791 | 2.62779 | 70.7092 | 81.1374 | 16.00 | 149.00 |
| Dermatitis | 100 | 51.2450 | 22.45832 | 2.24583 | 46.7888 | 55.7012 | 6.50 | 151.00 |
| Normal | 100 | 71.9700 | 17.64376 | 1.76438 | 68.4691 | 75.4709 | 23.00 | 117.00 |
| Total | 450 | 64.4723 | 26.07825 | 1.22934 | 62.0563 | 66.8883 | 2.00 | 183.00 |

**Table S2. Human-machine comparison results**

| Patient_id | Actual diagnosis | Doctor A | Doctor B | Doctor C | GBM Model |
| --- | --- | --- | --- | --- | --- |
| 1 | Acne |  |  | √ | √ |
| 2 | Acne |  |  |  | √ |
| 3 | Acne | √ |  |  |  |
| 4 | Acne |  |  |  | √ |
| 5 | Acne | √ |  |  |  |
| 6 | Acne |  | √ |  | √ |
| 7 | Acne |  | √ | √ | √ |
| 8 | Acne | √ | √ |  |  |
| 9 | Acne |  |  |  | √ |
| 10 | Acne |  |  |  |  |
| 11 | Acne |  | √ | √ | √ |
| 12 | Acne |  | √ | √ | √ |
| 13 | Acne | √ |  |  | √ |
| 14 | Acne |  | √ |  | √ |
| 15 | Acne | √ |  | √ | √ |
| 16 | Rosacea |  |  |  | √ |
| 17 | Rosacea | √ |  |  | √ |
| 18 | Rosacea | √ |  | √ | √ |
| 19 | Rosacea | √ | √ | √ | √ |
| 20 | Rosacea |  | √ |  | √ |
| 21 | Rosacea |  |  | √ | √ |
| 22 | Rosacea |  | √ |  | √ |
| 23 | Rosacea |  |  |  | √ |
| 24 | Rosacea |  |  | √ | √ |
| 25 | Rosacea |  |  |  | √ |
| 26 | Rosacea |  |  |  | √ |
| 27 | Rosacea | √ | √ | √ | √ |
| 28 | Rosacea | √ |  |  | √ |
| 29 | Rosacea |  |  | √ |  |
| 30 | Rosacea | √ |  |  | √ |
| 31 | Dermatitis |  |  |  | √ |
| 32 | Dermatitis | √ |  |  | √ |
| 33 | Dermatitis |  | √ | √ | √ |
| 34 | Dermatitis | √ | √ |  | √ |
| 35 | Dermatitis |  |  | √ | √ |
| 36 | Dermatitis |  | √ |  | √ |
| 37 | Dermatitis |  |  |  | √ |
| 38 | Dermatitis |  |  | √ | √ |
| 39 | Dermatitis |  | √ |  | √ |
| 40 | Dermatitis | √ |  |  |  |
| 41 | Dermatitis |  |  | √ | √ |
| 42 | Dermatitis | √ | √ | √ | √ |
| 43 | Dermatitis | √ | √ | √ | √ |
| 44 | Dermatitis |  |  |  | √ |
| 45 | Dermatitis |  | √ |  |  |
